# Supplementary material
Source: PubMed Central journal article supplement (PMC6390277)
Supplement: NIHMS1004790-supplement-Supplement_1.pdf [file NIHMS1004790-supplement-Supplement_1.pdf]

## SUPPLEMENTAL MATERIALS

**Supplemental Figure 1.** Advertisement presented to participants.

Source: Trinkets and Trash (2015).

**100% ADDITIVE-FREE**

**NATURAL AMERICAN SPIRIT**  
100% ADDITIVE-FREE NATURAL TOBACCO  
MENTHOL FULL-BODIED TASTE

**NATURAL AMERICAN SPIRIT**  
100% ADDITIVE-FREE NATURAL TOBACCO  
SMOOTH MELLOW TASTE

**NATURAL AMERICAN SPIRIT**  
100% ADDITIVE-FREE NATURAL TOBACCO  
FULL-BODIED TASTE

**NATURAL AMERICAN SPIRIT**  
100% ADDITIVE-FREE NATURAL TOBACCO  
MELLOW TASTE

**NATURAL AMERICAN SPIRIT**  
100% ADDITIVE-FREE NATURAL TOBACCO  
MENTHOL MELLOW TASTE

**NATURAL TOBACCO**

**THIS TOBACCO TASTES UNLIKE ANY YOU'VE EVER SMOKED.**

We have 13 styles of Natural American Spirit cigarettes, each one suited to a different taste.

We use only 100% additive-free, whole leaf natural tobacco in every cigarette. So we enjoy hearing things like: "This doesn't taste like my usual cigarette." That's because it's not supposed to.

**EXPERIENCE NATURAL AMERICAN SPIRIT**  
*with two packs for \$2*

**PROMO CODE**  
Visit [TryAmericanSpirit.com](http://TryAmericanSpirit.com)  
or call 1-800-435-5515

Offer for two "1 for \$1" Gift Certificates good toward any Natural American Spirit pack or pouch purchase (excludes 150g tins). Not to be used in conjunction with any other offer. Offer restricted to U.S. smokers 21 years of age and older. Limit one offer per person per 12 month period. Offer void in MA and where prohibited. Other restrictions may apply. Offer expires 09/30/12.

**CIGARETTES**

**SURGEON GENERAL'S WARNING: Smoking By Pregnant Women May Result in Fetal Injury, Premature Birth, And Low Birth Weight.**

**No additives in our tobacco does **NOT** mean a safer cigarette.**

Natural American Spirit® is a registered trademark of Santa Fe Natural Tobacco Co. © SFNTC 2 2012
